# Supplementary material for: Evidence for Virus-Mediated Oncogenesis in Bladder Cancers Arising in Solid Organ Transplant Recipients
Source: bioRxiv or medRxiv preprint supplement (doi:10.1101/2021.11.11.21266080), 2022-08-13

Figure S1

A

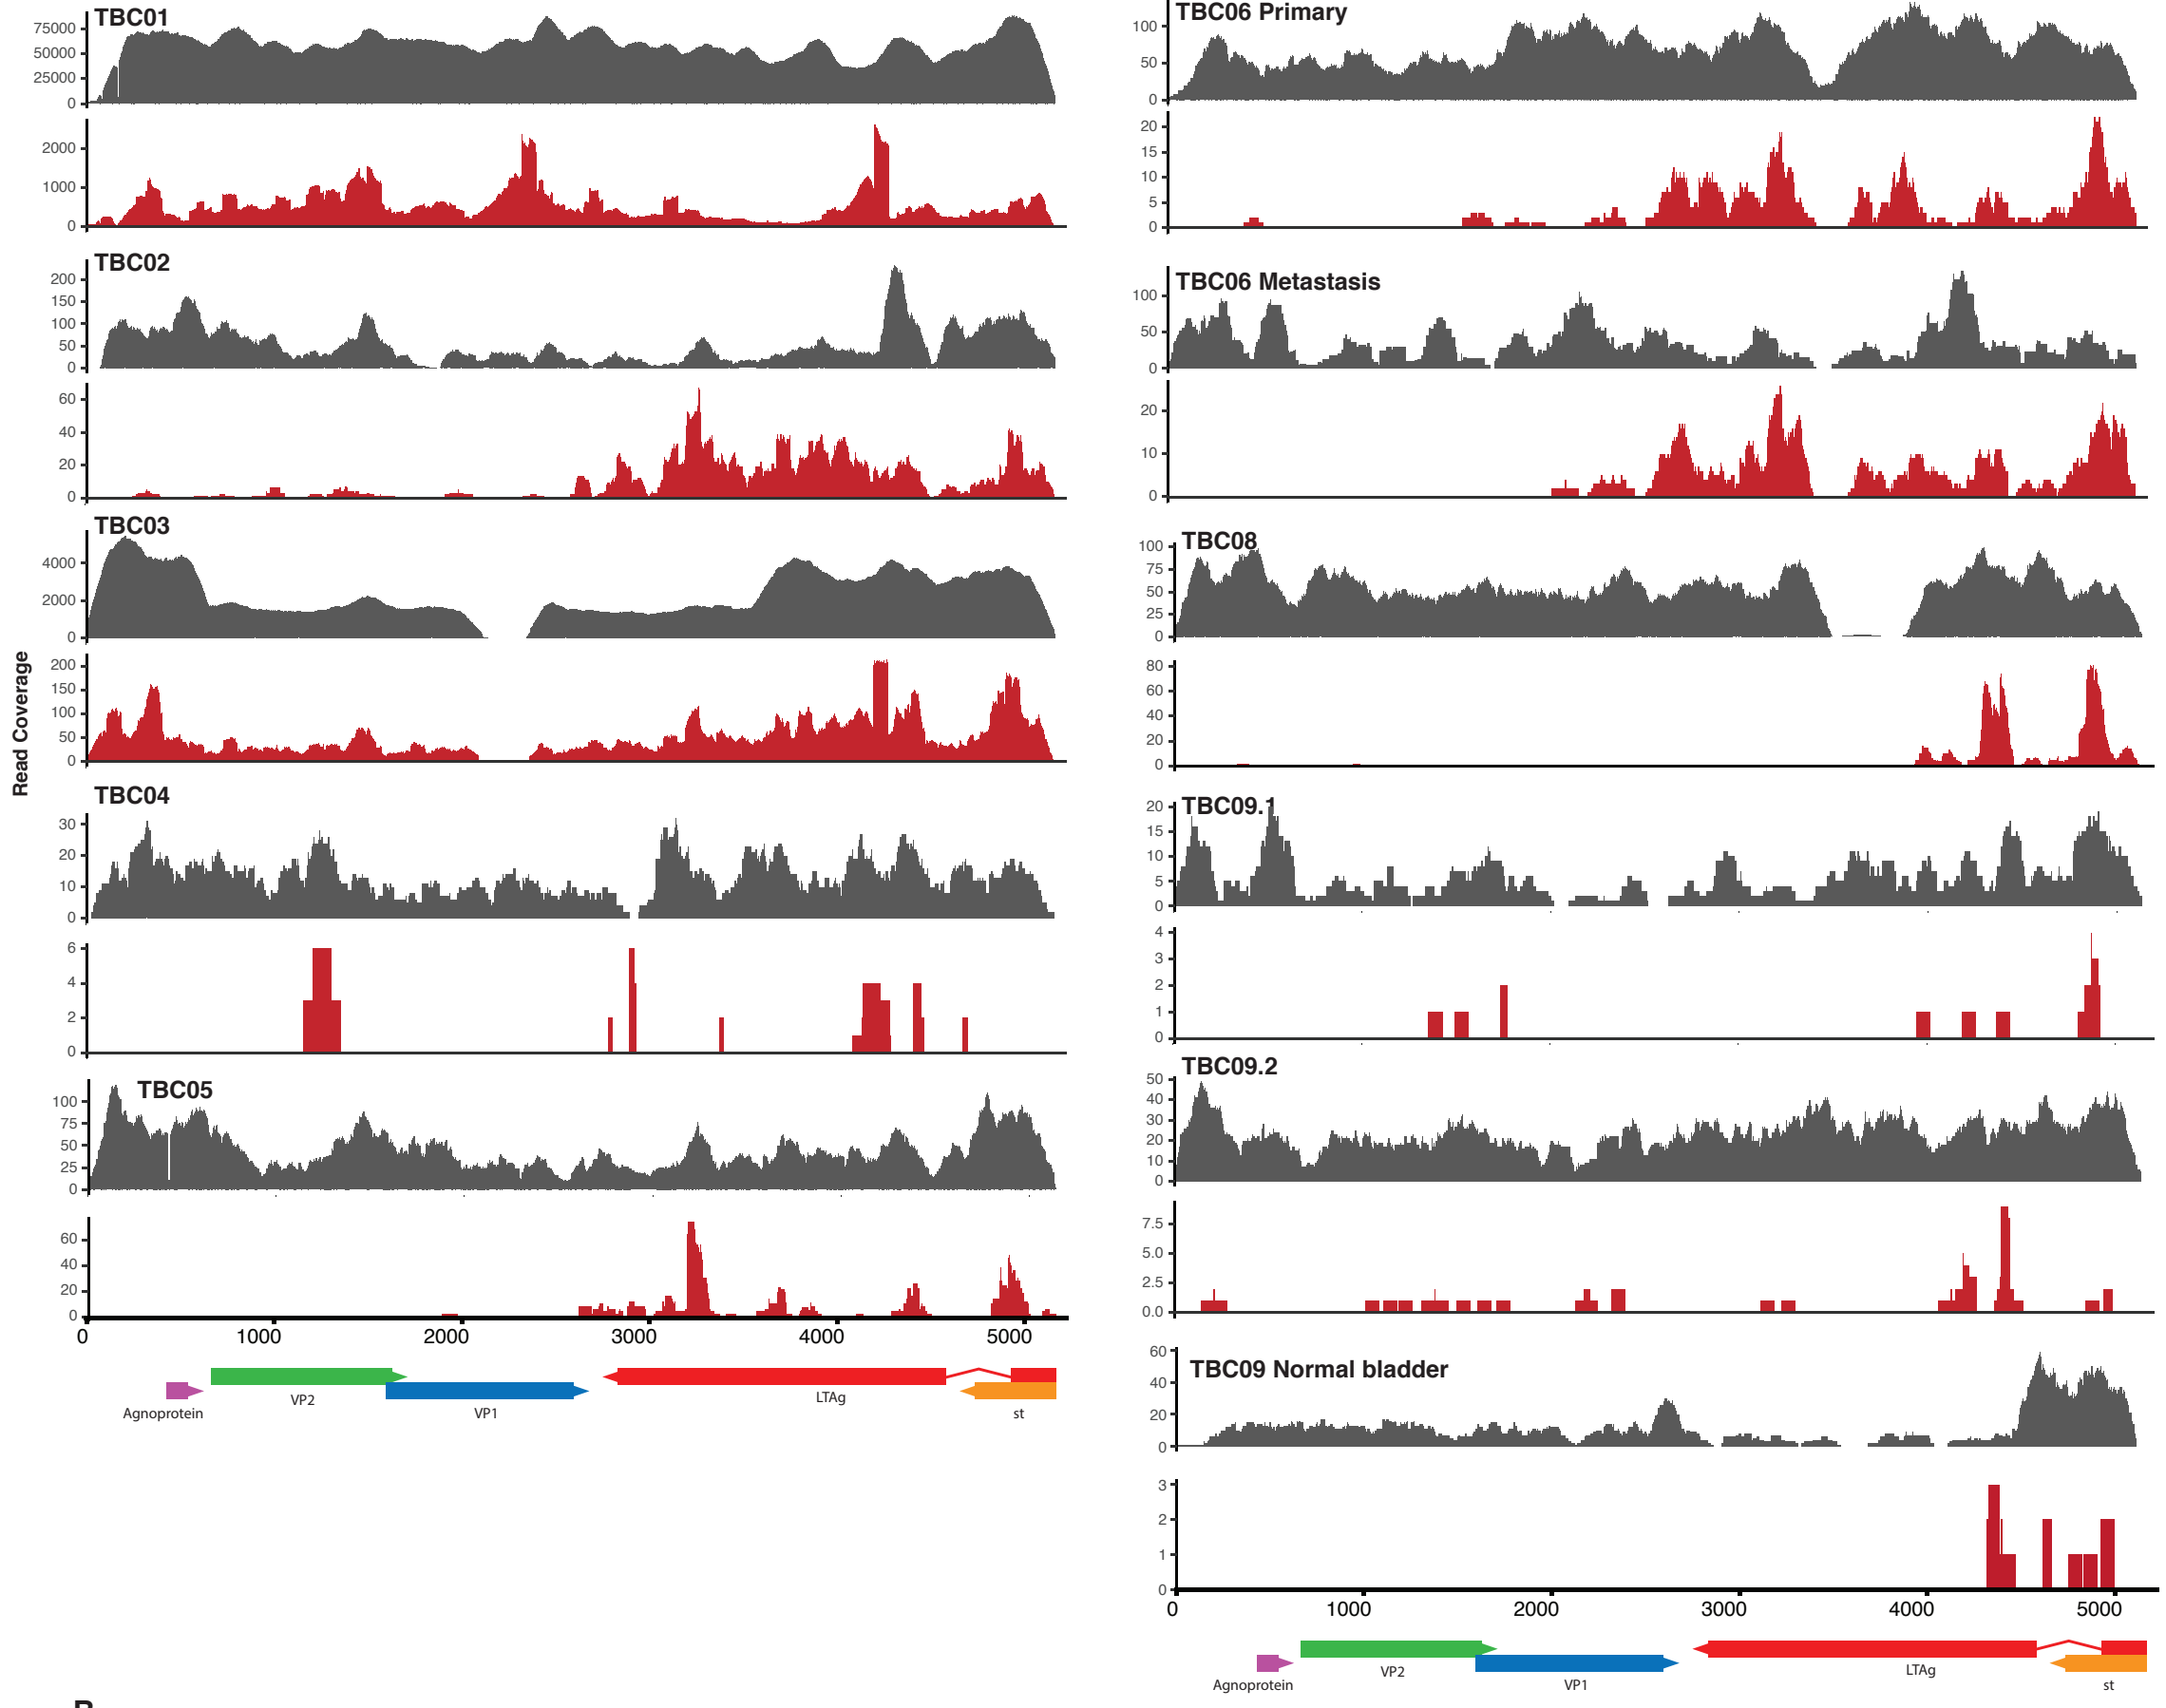

B

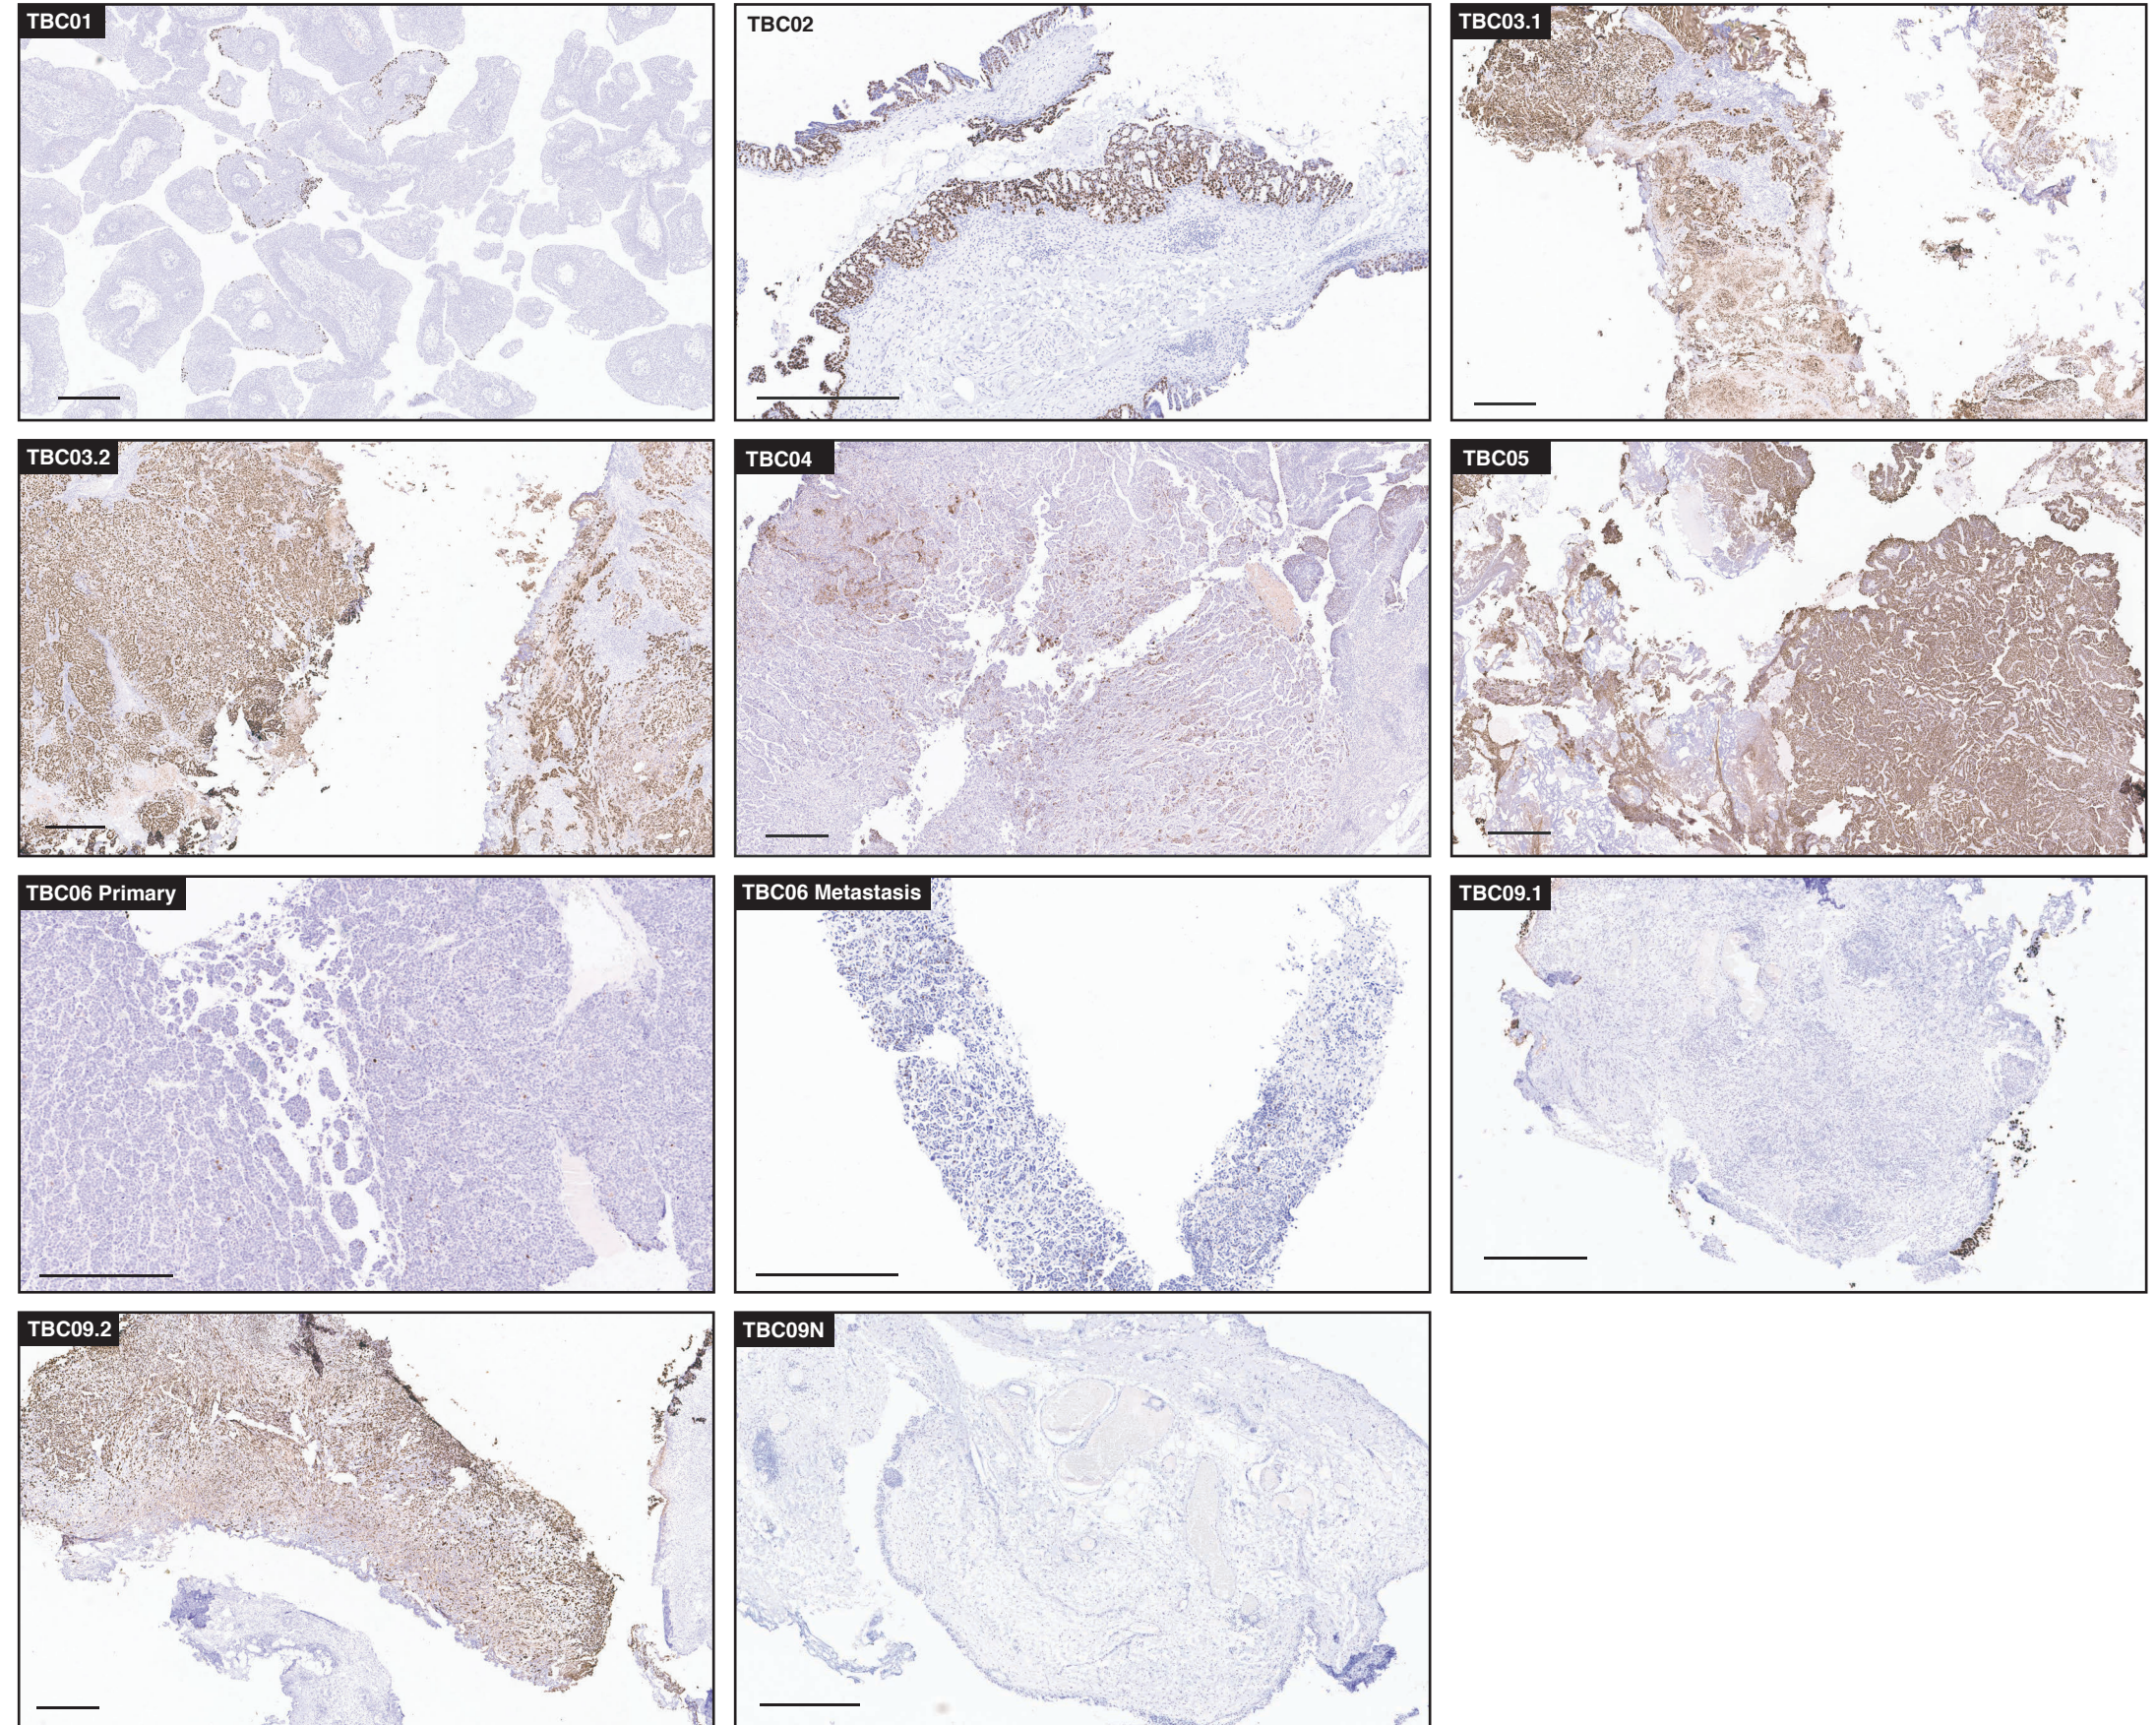

C

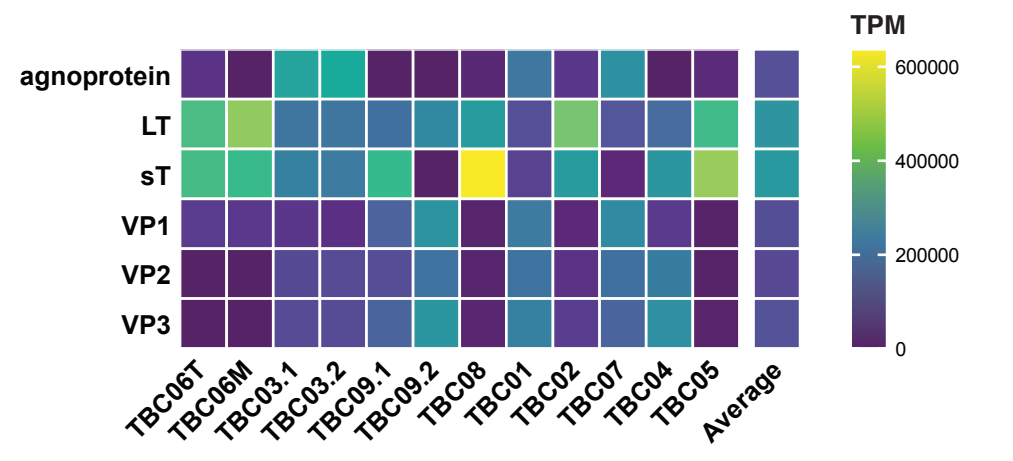

D

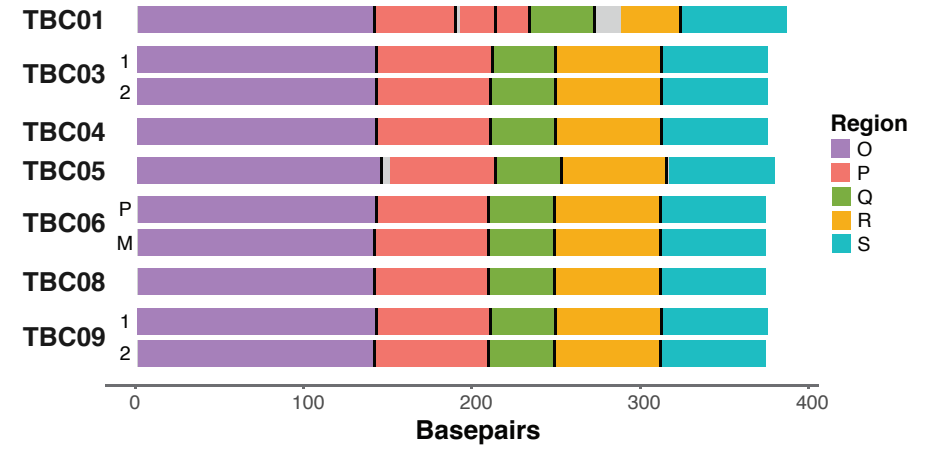

Figure S2

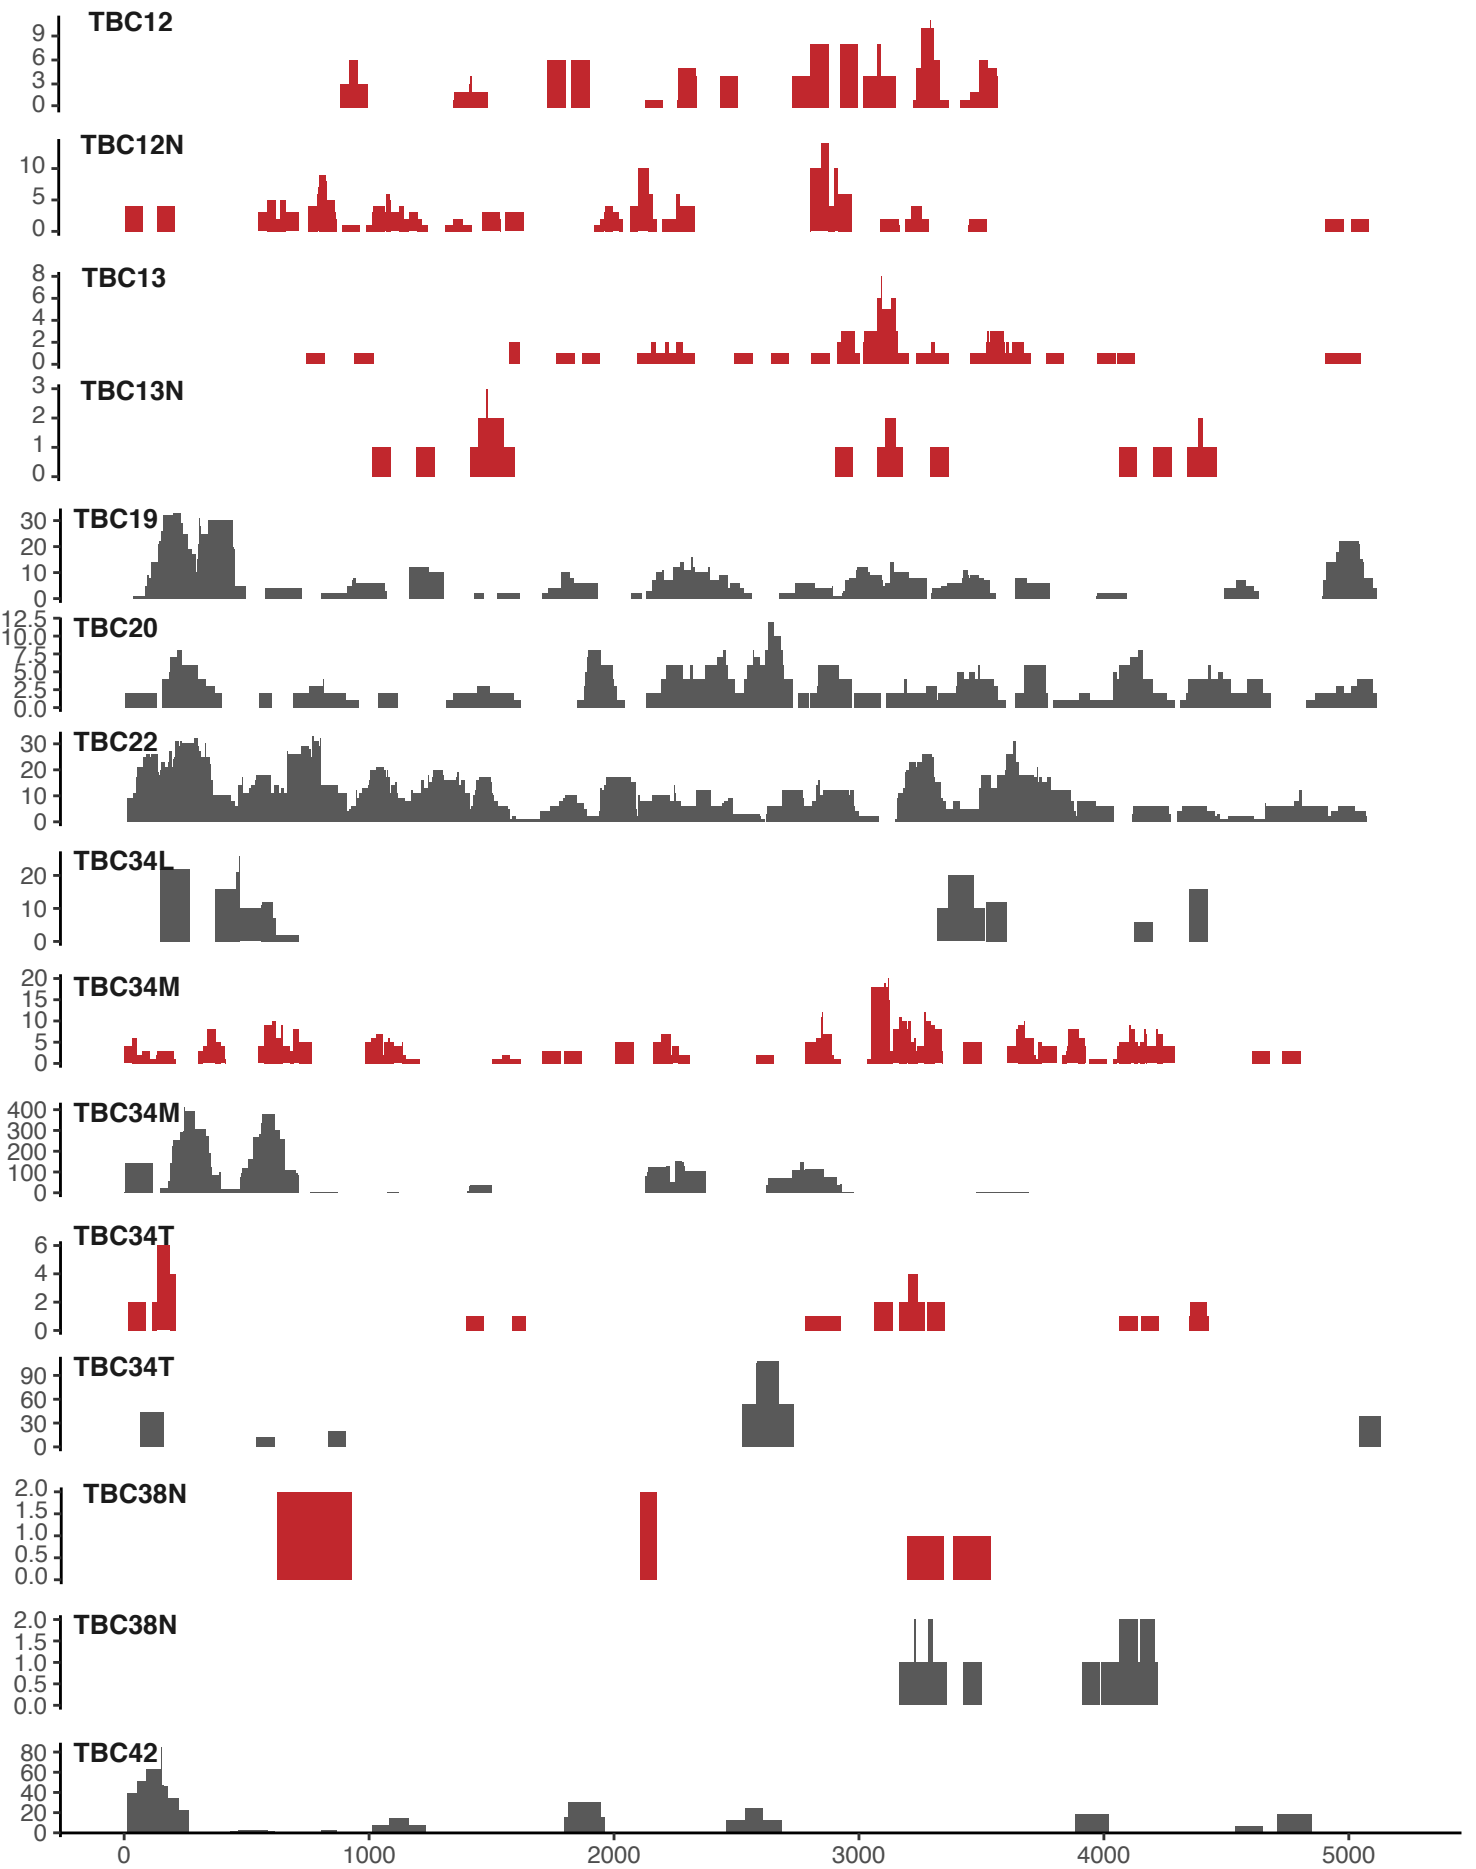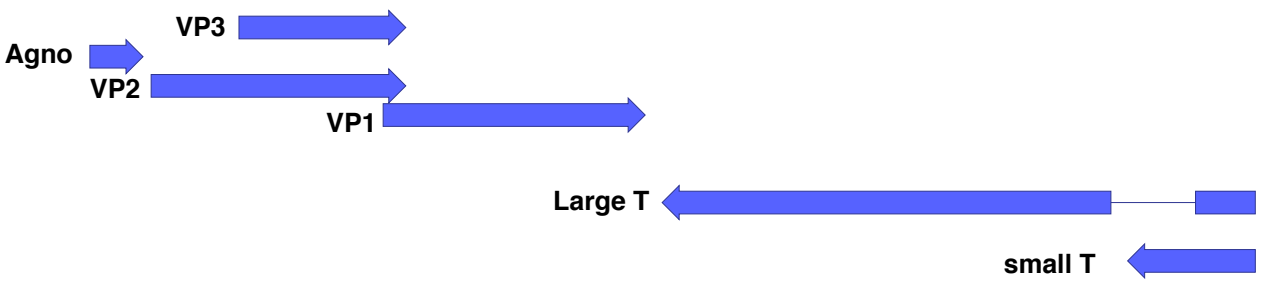

**Figure S3**

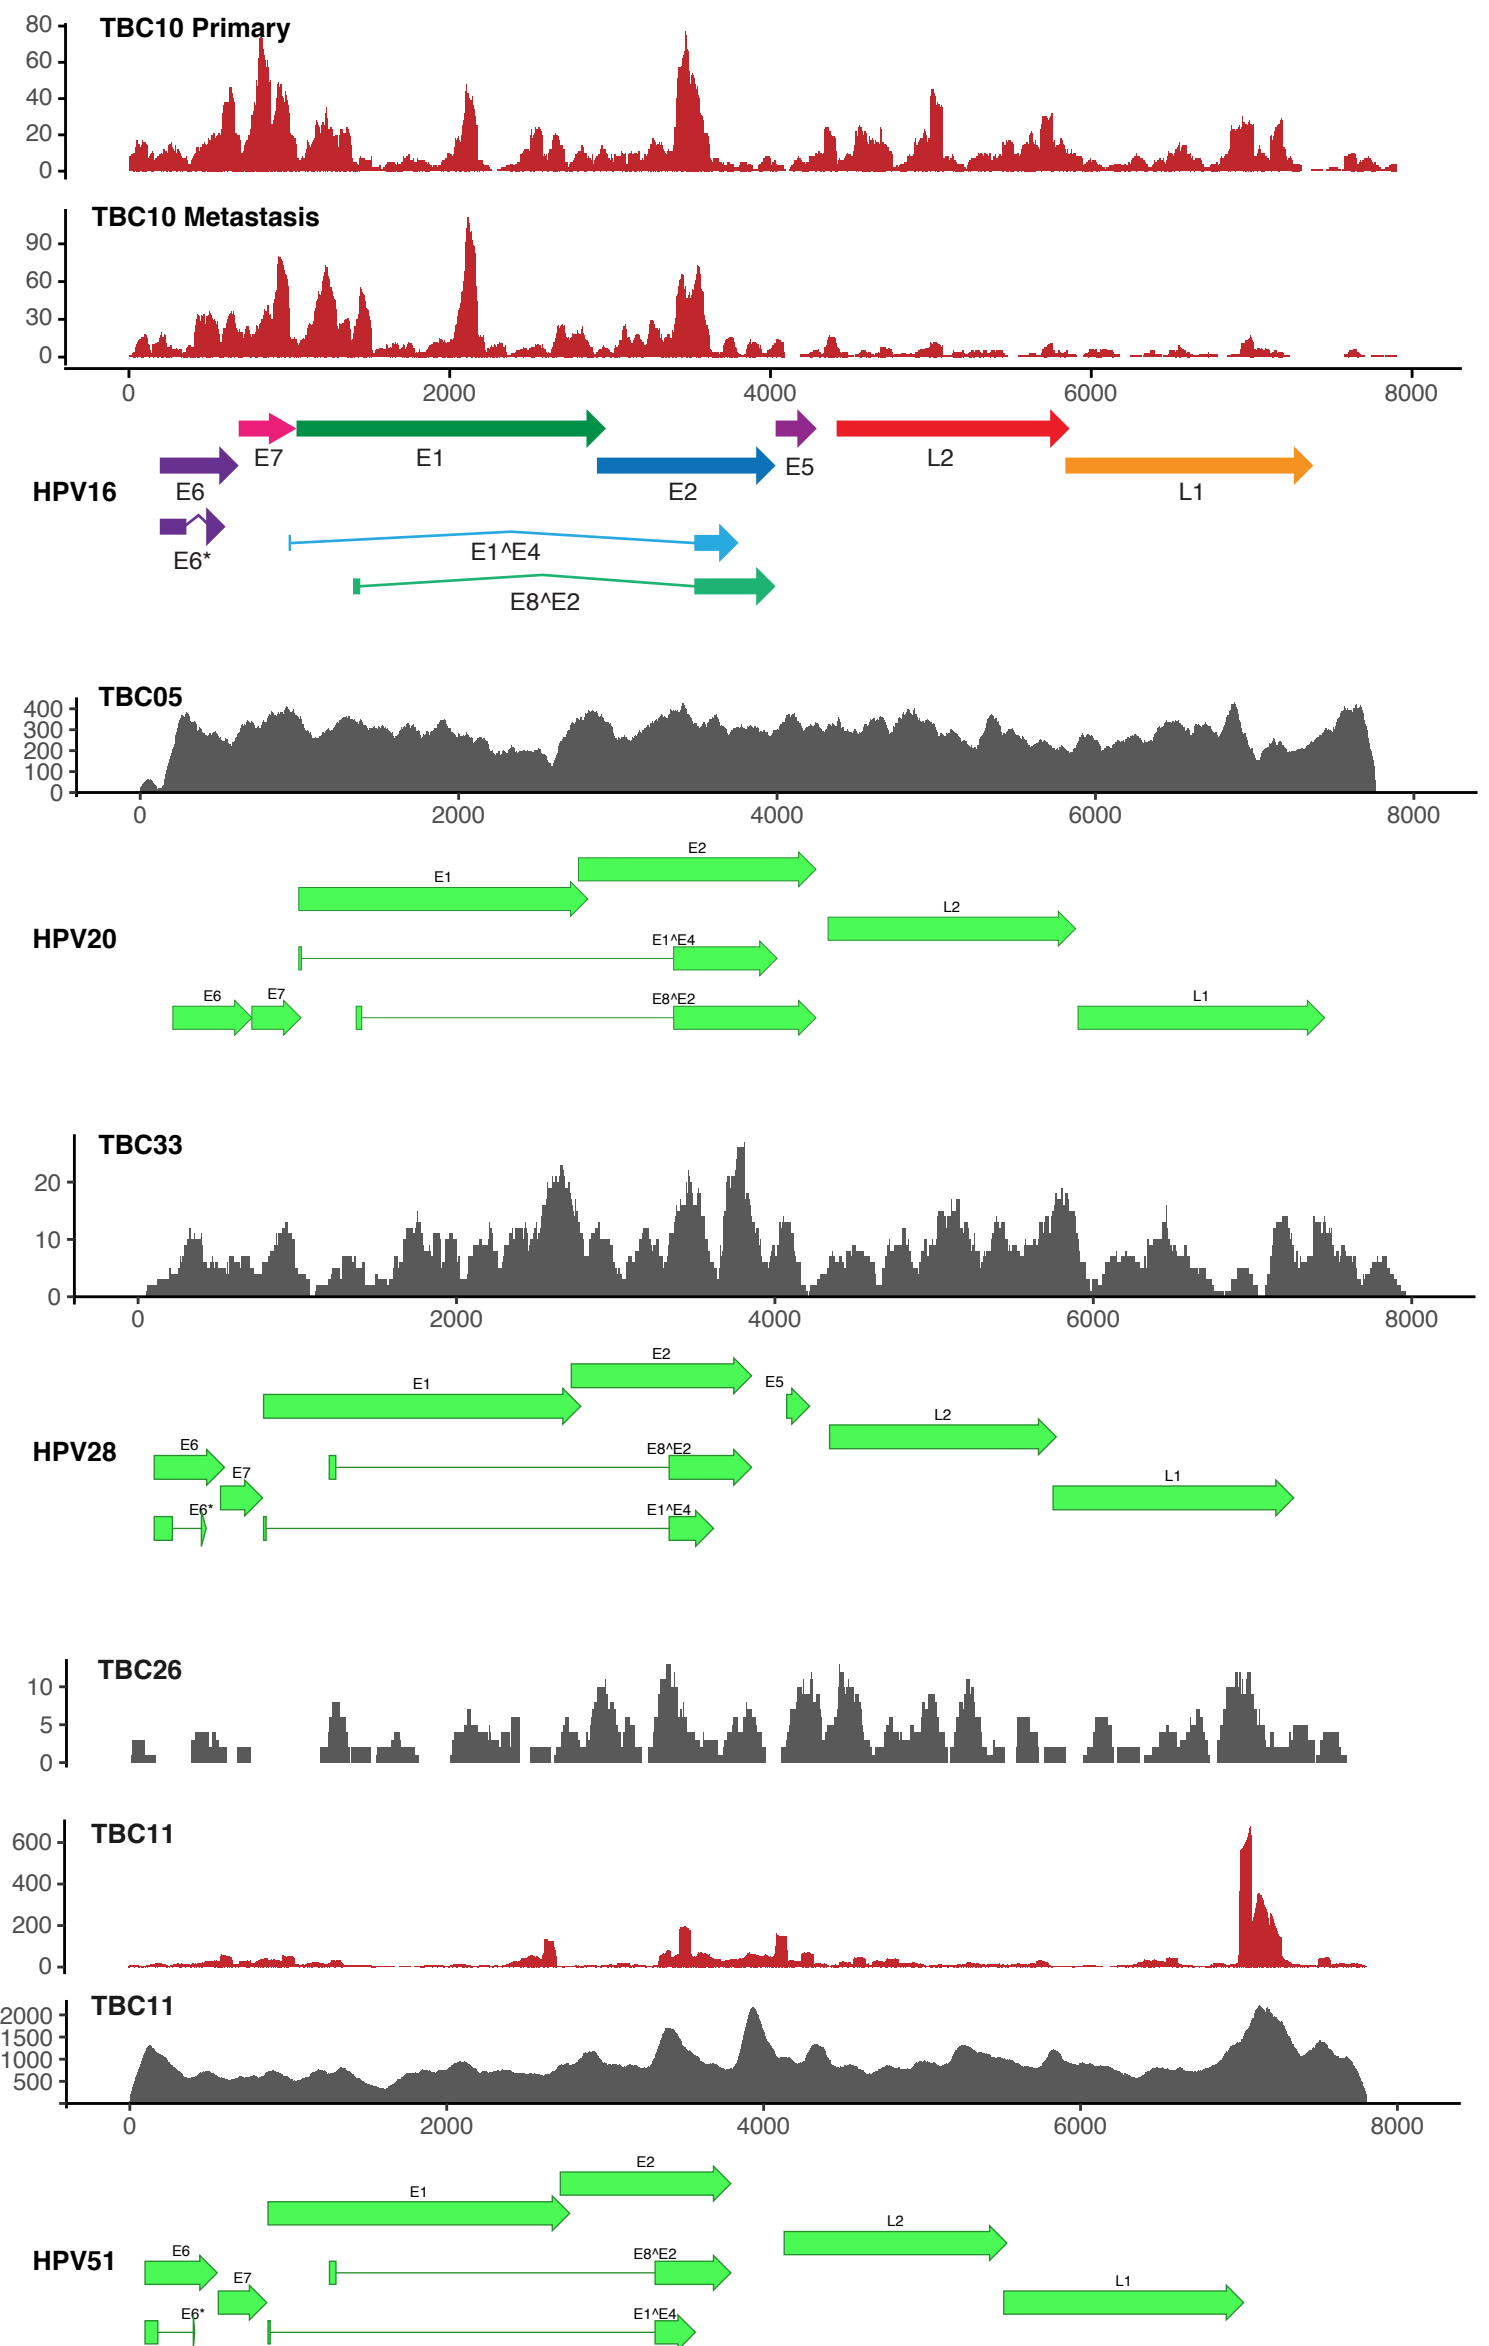

**Figure S4**

**A**

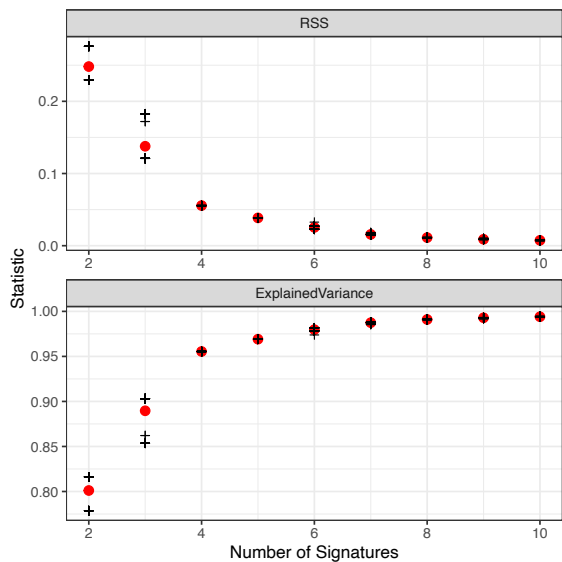

**B**

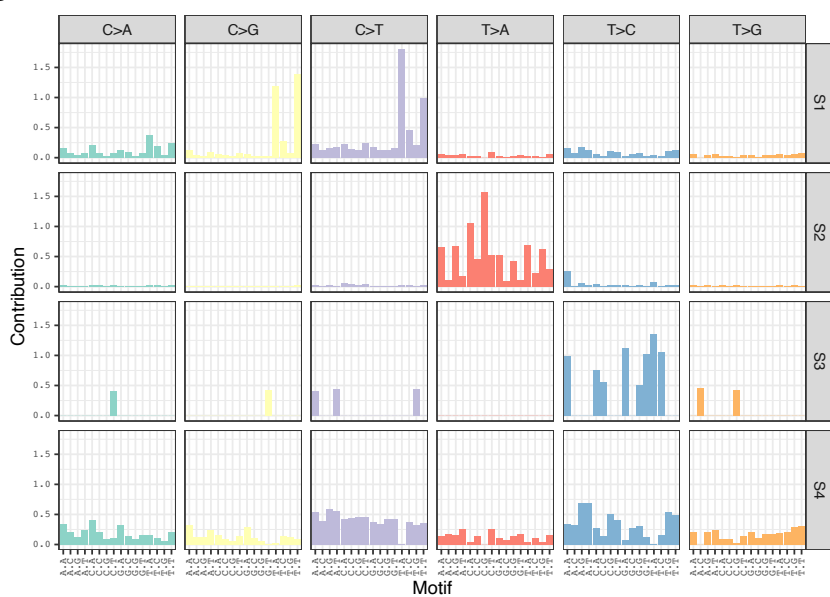

**C**

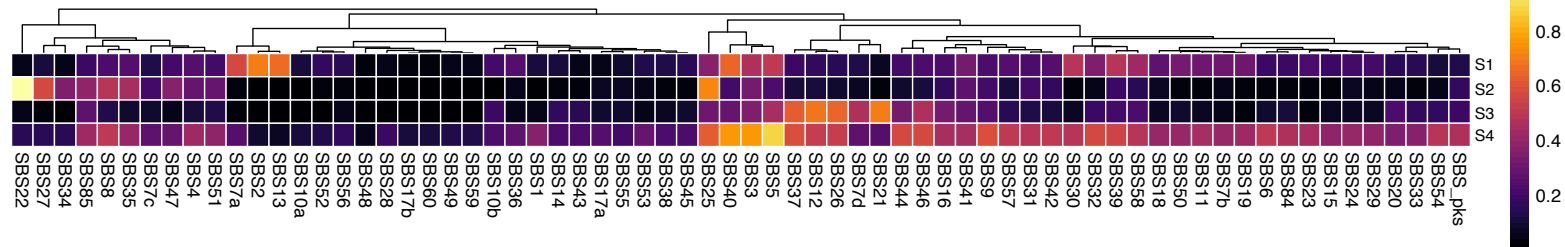

**D**

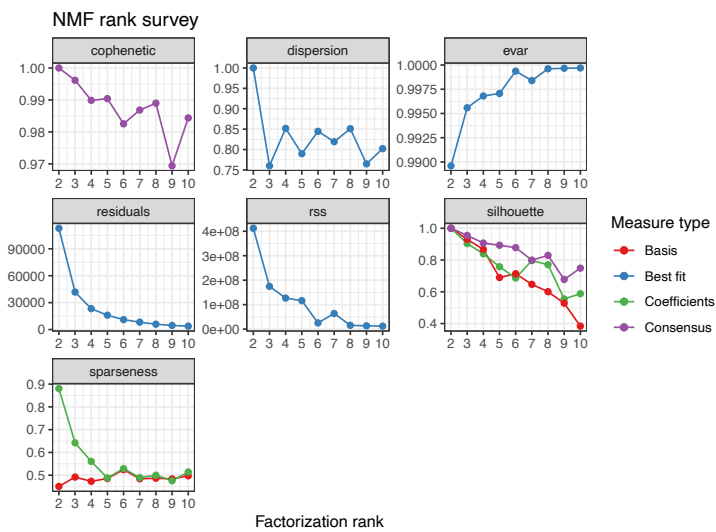

**E**

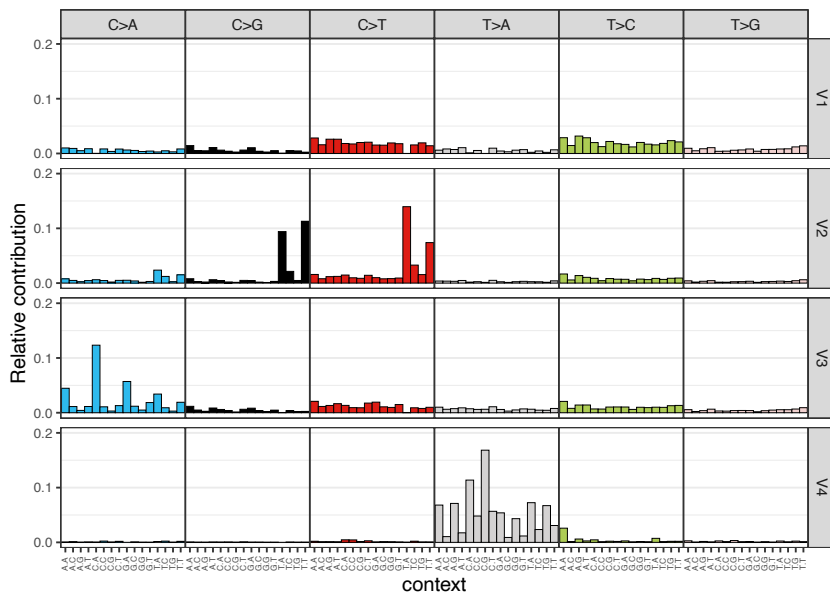

**F**

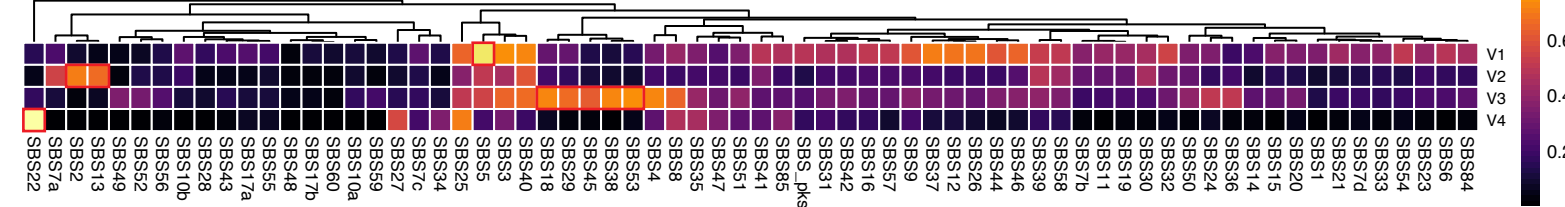

**Figure S5**

rs1014971

T/T

T/C

C/C

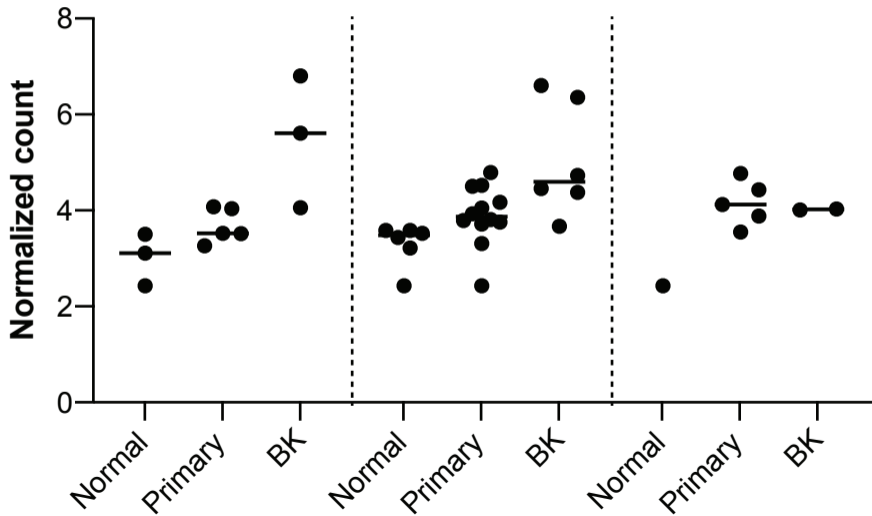

Supplement: Supplementary file [file media-2.pdf]
